# Supplementary material
Source: PubMed Central journal article supplement (PMC6535112)
Supplement: NIHMS1520039-supplement-1.pdf [file NIHMS1520039-supplement-1.pdf]

# SUPPLEMENTARY FIGURE S1

## A. Alpha diversity

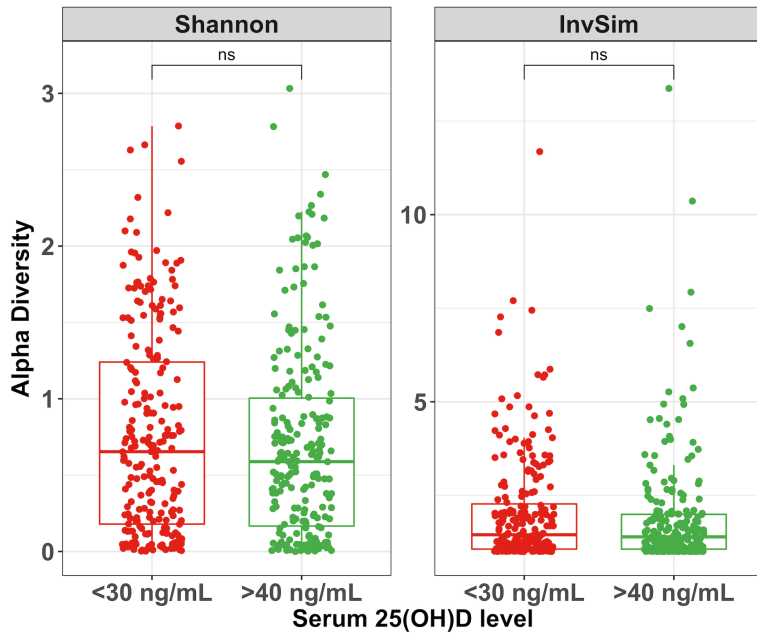

## B. Beta diversity PCoA: bray distance

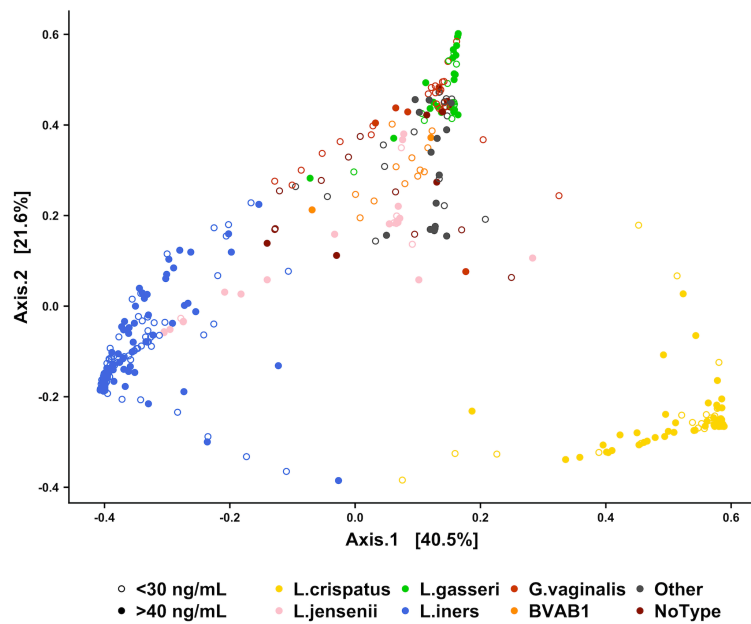

Figure S1 Vaginal microbiome and 25(OH)D are not associated with respect to diversity or Bray-Curtis dissimilarity.
